# Supplementary material for: Vibration reduction ability of MWCNT PVAc composites measured under high frequency for acoustic device application
Source: Royal Society of Chemistry journal article supplement (doi:10.1039/c0jm03335a), 2011-01-01
Supplement: c0jm03335a.pdf [file c0jm03335a.pdf]

Supporting Information for:

**Vibration reduction ability of MWCNT PVAc composites  
measured under high frequency for acoustic device  
application**

Zhaowei Wang,<sup>a</sup> Raymond L.D. Whitby, <sup>\*a</sup> Sergey V. Mikhlovsky,<sup>a</sup> Martial Rousseau,<sup>b</sup>  
Stuart Nevill,<sup>b</sup> Gary Geaves<sup>b</sup>

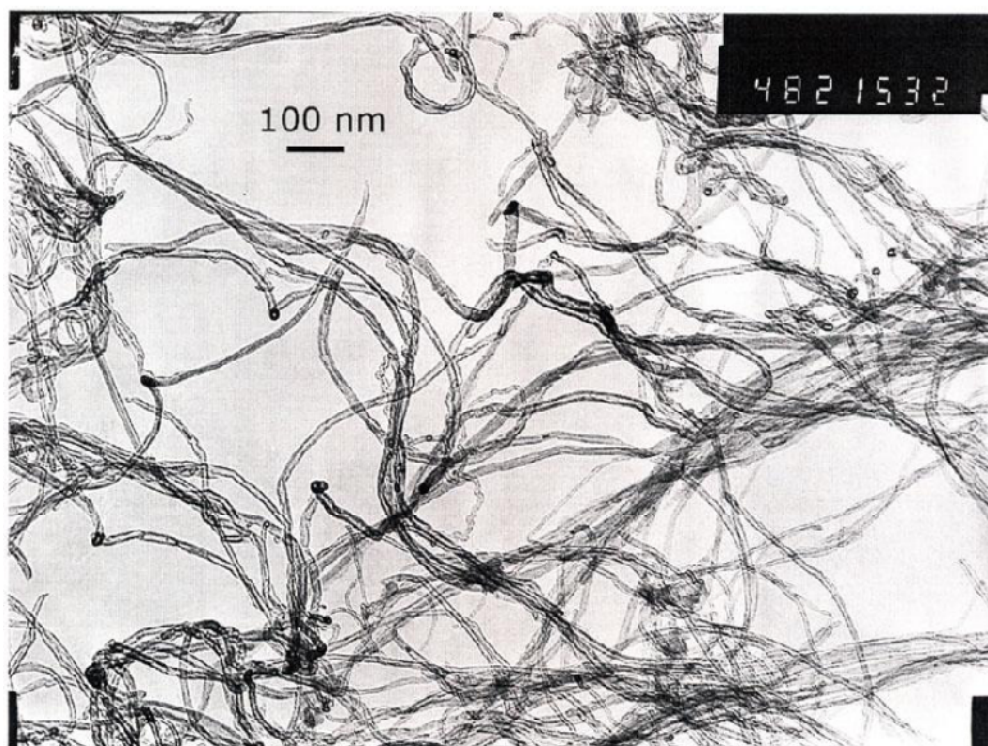

**Fig. S1** TEM image of commercial MWCNTs from TMSpetsmash, Ukraine.

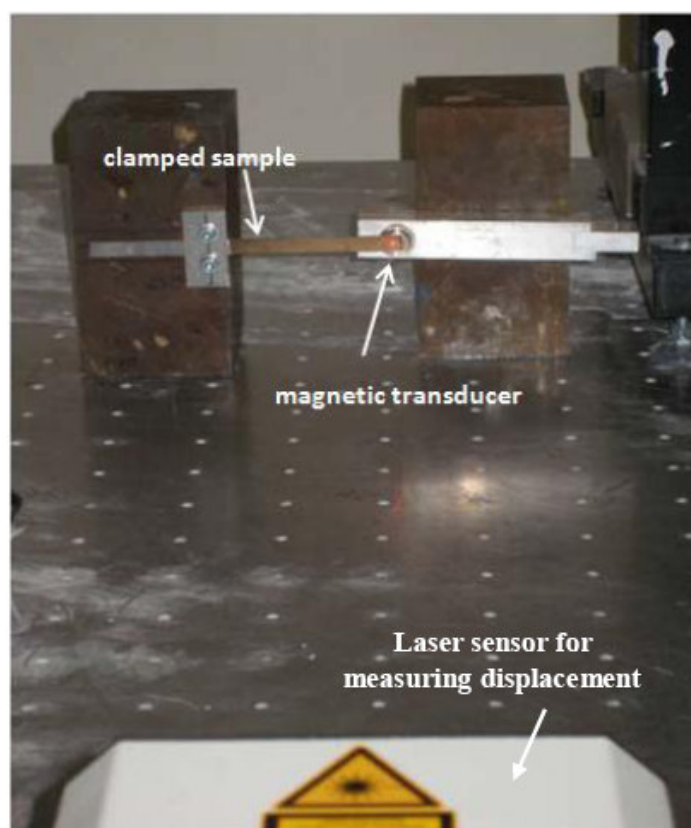

**Fig. S2** Experimental setup for frequency response measurement of MWCNT/PVAc composites (maximum excitation frequency is 5 KHz).

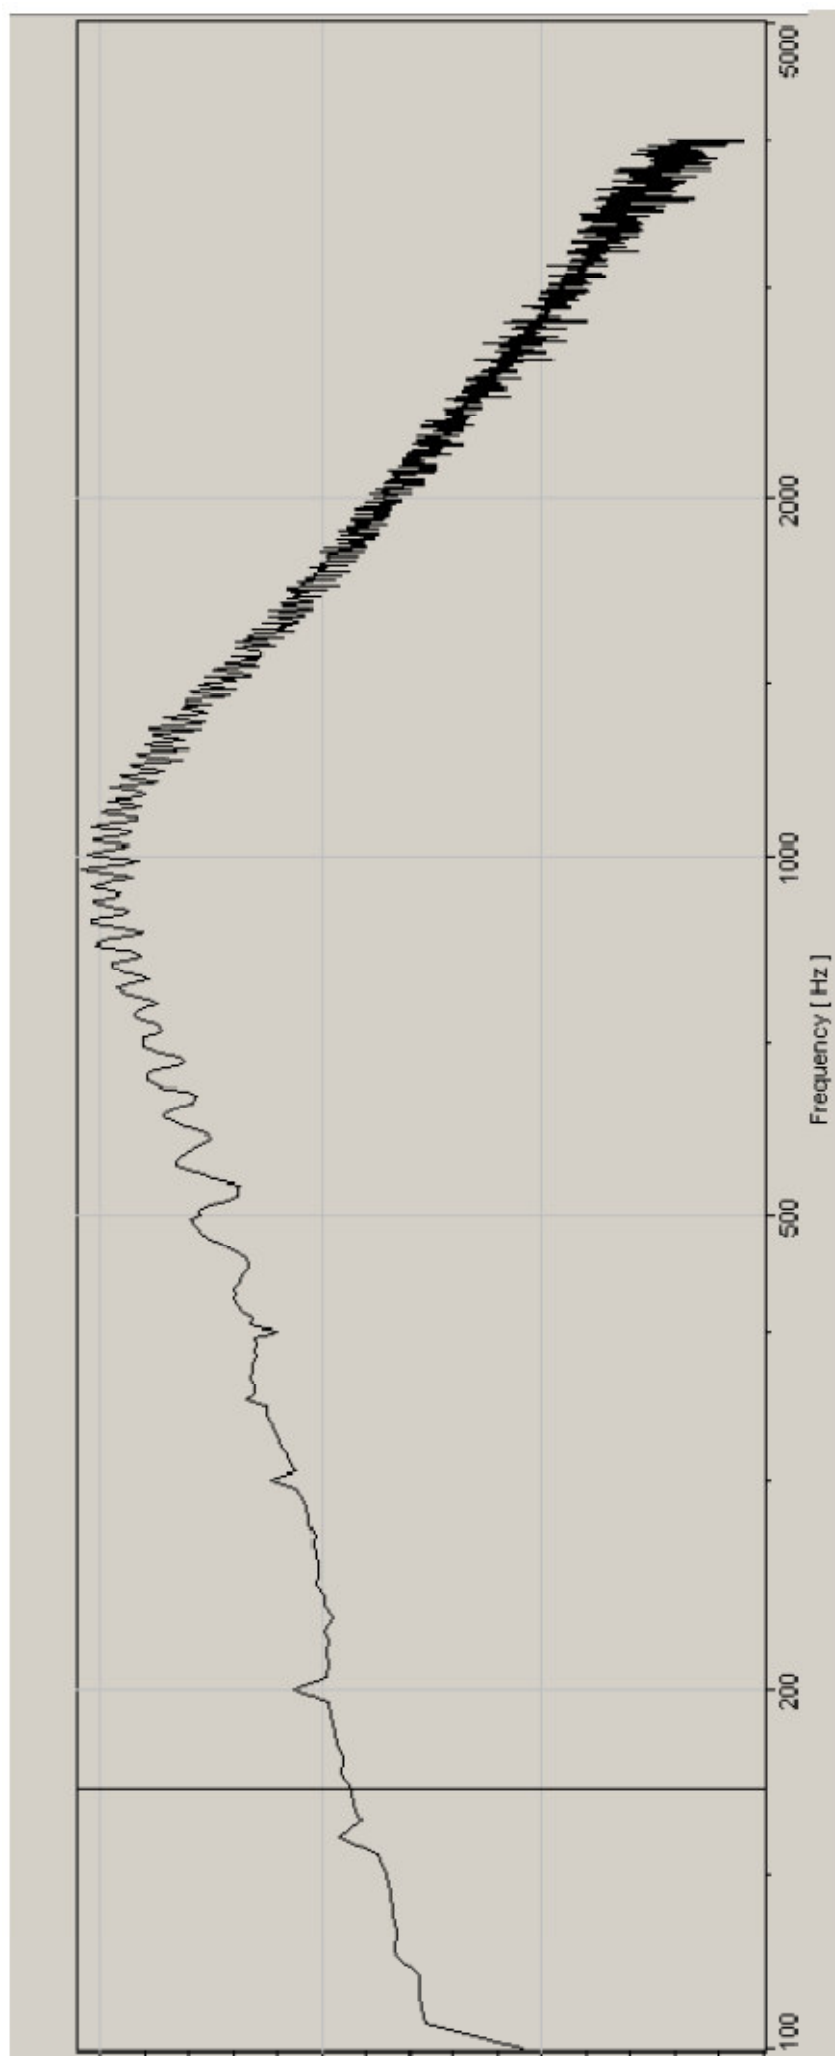

**Fig. 3S** Frequency response spectrum for 0.5 wt% pristine MWCNT/PVAc composites. The Y-axis represents sample displacement.

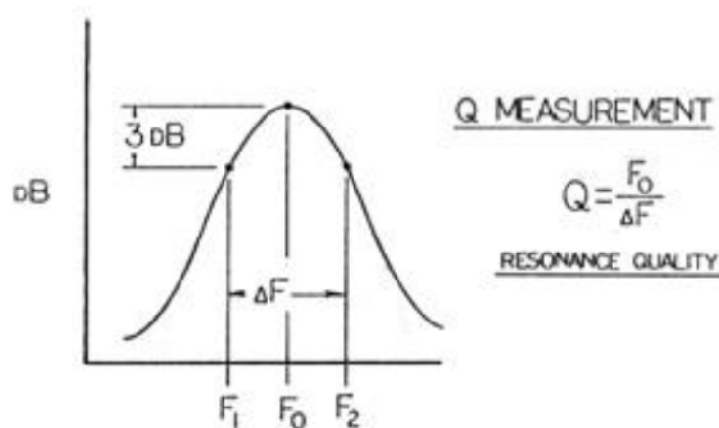

**Fig. S4** Illustration of half-power bandwidth.

In designing 3D FE model, the input parameters are sample geometry, density, damping ratio and poisson ratio which is a constant of 0.3 for all PVAc and their MWCNT composites. In the FE analysis, it is assumed that:

- Constraints: the edge of the sample is clamped to an infinitely rigid surface;
- A force is applied at the end of the beam and the resulting displacement is calculated at the same node;
- A viscoelastic material law is applied for the material: it is defined as a complex dynamic Young's modulus.

All the parameters are known apart from the Young's modulus, which is adjusted until the simulated displacement matched the measured one.

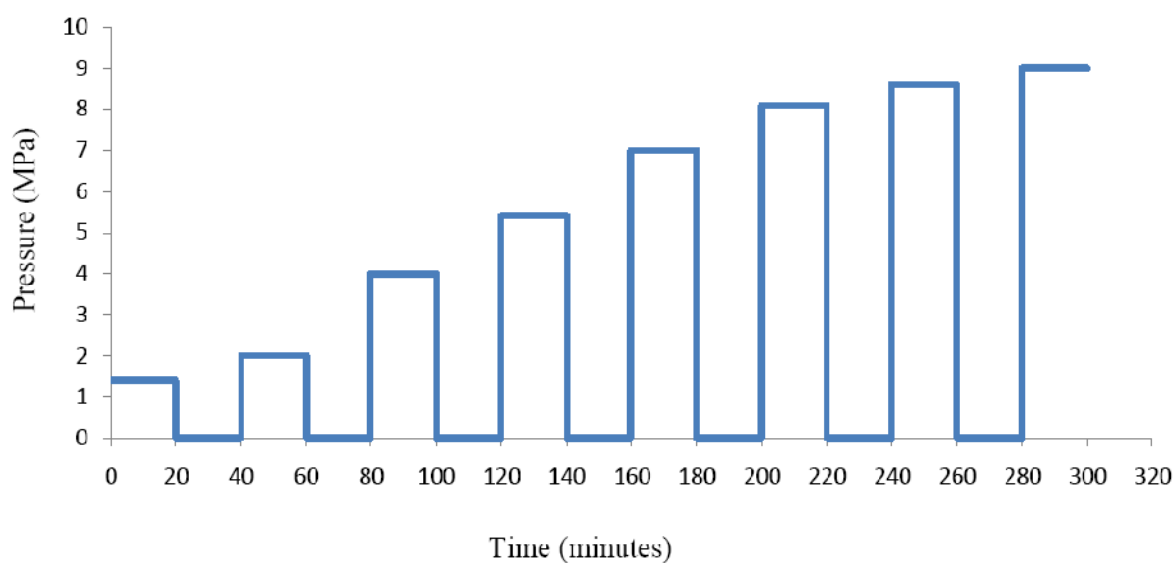

**Fig. S5** Time against pressure during hot-pressing.

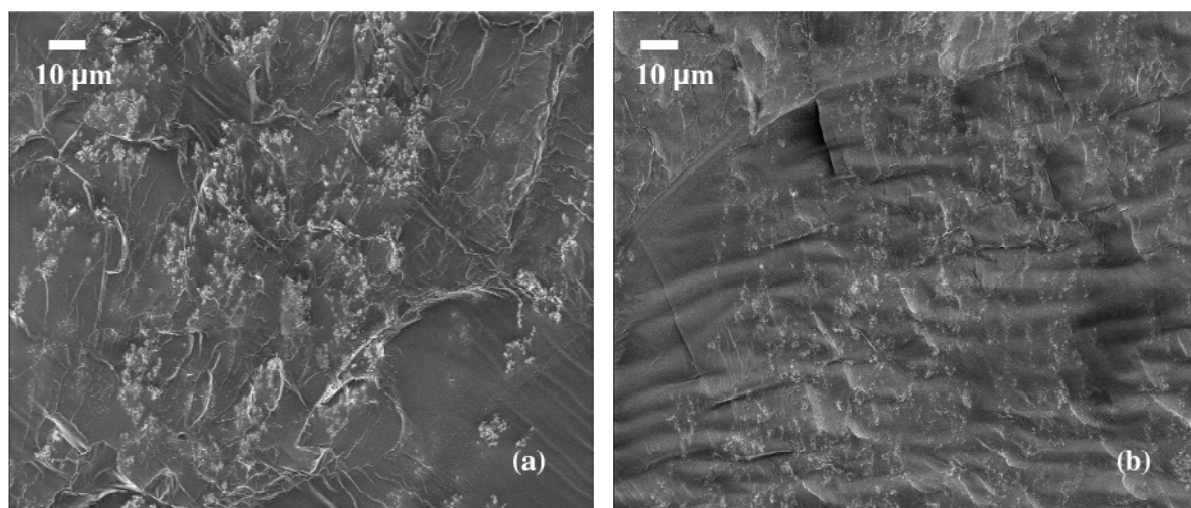

**Fig. S6** SEM images of the fracture surface after immersing in liquid N<sub>2</sub> for 0.5 wt% PVAc with pristine MWCNTs (a) and MWCNT-CH=CH-PVAc (b).

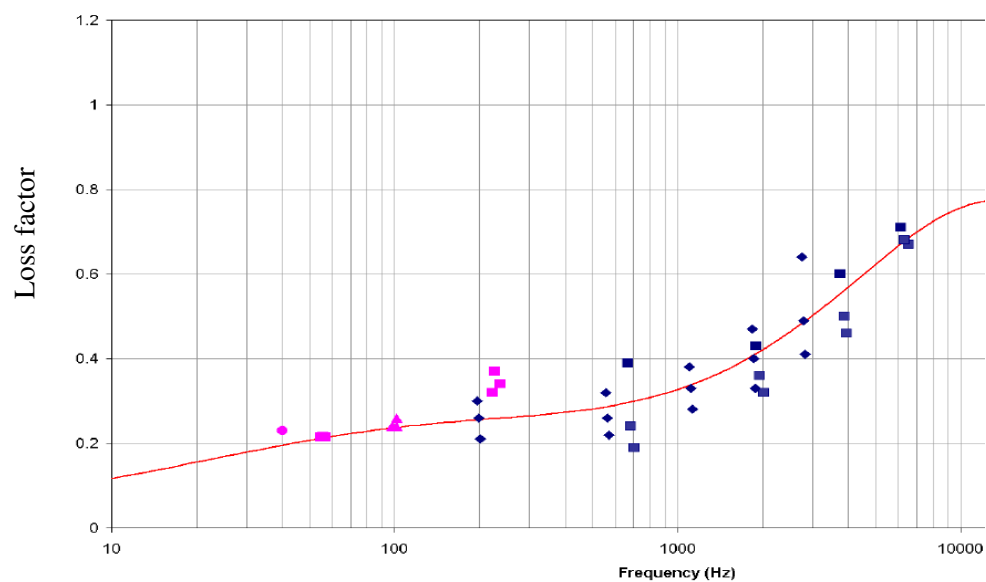

**Fig. S7** Loss factor ( $\eta$ ) against frequency (Hz) of pure PVAc.
